# Supplementary material for: Molecular Signatures of Tumour and Its Microenvironment for Precise Quantitative Diagnosis of Oral Squamous Cell Carcinoma: An International Multi-Cohort Diagnostic Validation Study
Source: MDPI journal article supplement (doi:10.3390/cancers14061389), 2022-03-09
Supplement: s1 [file s1]

Supplementary Materials

# Molecular Signatures of Tumour and its Microenvironment for Precise Quantitative Diagnosis of Oral Squamous Cell Carcinoma: An International Multi-Cohort Diagnostic Validation Study

Muy-Teck Teh<sup>1,2,3\*</sup>, Hong Ma<sup>2</sup>, Ying-Ying Liang<sup>3</sup>, Monica Charlotte Solomon<sup>4</sup>, Akhilanand Chaurasia<sup>5</sup>, Ranjitkumar Patil<sup>5</sup>, Satyajit Ashok Tekade<sup>6</sup>, Deepika Mishra<sup>7</sup>, Fatima Qadir<sup>1</sup>, Ji-Yun Stephanie Yeung<sup>1</sup>, Xinting Liu<sup>1</sup>, Safa Kriuar<sup>1</sup>, Ruoqi Zhao<sup>1</sup>, Ahmad Waseem<sup>1</sup>, Iain L. Hutchison<sup>1,8,9</sup>

Table S1. – qMIDS<sup>V2</sup> Gene Panel Primer Sequences.

| Gene     | Loci     | Forward Primer         | Reverse Primer          | Bp <sup>a</sup> |
|----------|----------|------------------------|-------------------------|-----------------|
| HOXA7    | 7p15.2   | GCCAATTTCCGCATCTACCC   | GGTAGCGGTTGAAGTGGAAC    | 121             |
| CENPA    | 2p23.3   | CTGCACCCAGTGTTCCTGTC   | GAGAGTCCCCGGTATCATCC    | 63              |
| NEK2     | 1q32.3   | CATTGGCACAGGCTCCTAC    | GAGCCATAGTCAAGTCTTTCCA  | 90              |
| DNMT1    | 19p13.2  | CGATGTGGCGTCTGTGAG     | TGTCCTTGCAGGCTTTACATT   | 64              |
| INHBA*   | 7p14.1   | GCTCAGACAGCTCTTACCACA  | AAATTCTCTTTCTGGTCCCCACT | 69              |
| FOXN1    | 12p13.33 | ACTTAAAGCACATTGCCAAGC  | CGTGCAGGAAAAGGTTGT      | 63              |
| TOP2A*   | 17q21.2  | CAGTGAAGAAGACAGCAGCAAA | AAGCTGGATCCCTTTTAGTTC   | 96              |
| BIRC5*   | 17q25.3  | AGAACTGGCCCTTCTTGGA    | ACACTGGGCAAAGTCTGG      | 104             |
| MMP13*   | 11q22.2  | TGAGCTGGACTCATTGTCGG   | AGGTAGCGCTCTGCAAACCTG   | 94              |
| CXCL8*   | 4q13.3   | AAGTTTTTGAAGAGGGCTGAGA | TGGCATCTTCACTGATTCTTGGA | 74              |
| NR3C1*   | 5q31.3   | TCCCTGGTCAACAGTTTTT    | GCTGGATGGAGGAGAGCTTA    | 77              |
| IVL      | 1q21.3   | TGCCTGAGCAAGAATGTGAG   | TTCTCATGCTGTTCCCACT     | 83              |
| CBX7*    | 22q13.1  | CGAGTATCTGGTGAAGTGGA   | GGGGGTCCAAGATGTGCT      | 77              |
| S100A16* | 1q21.3   | CAAGATCAGCAAGAGCAGCTT  | GAGCTTATCCGCAGCCTTC     | 94              |
| YAP1     | 11q22.1  | ACAATGACGACCAATAGCTCAG | CCACTGTCTGTACTCTCATCTCG | 77              |
| POLR2A   | 17p13.1  | TCCGTATTCGCATCATGAAC   | TCATCCATCTTGCCACCAC     | 73              |

\*Indicates the 8 new genes in qMIDS<sup>V2</sup> over qMIDS<sup>V1</sup>. <sup>a</sup>Indicates the basepair length of each PCR amplicon.

**Citation:** Teh, M.-T.; Ma, H.; Liang, Y.-Y.; Solomon, M.C.; Chaurasia, A.; Patil, R.; Tekade, S.A.; Mishra, D.; Qadir, F.; Yeung, J.-Y.S.; et al. Molecular Signatures of Tumour and Its Microenvironment for Precise Quantitative Diagnosis of Oral Squamous Cell Carcinoma: An International Multi-Cohort Diagnostic Validation Study. *Cancers* **2022**, *14*, 1389. <https://doi.org/10.3390/cancers14061389>

Academic Editor: Chamindie K. Punyadeera

Received: 15 February 2022

Accepted: 4 March 2022

Published: 9 March 2022

**Publisher's Note:** MDPI stays neutral with regard to jurisdictional claims in published maps and institutional affiliations.

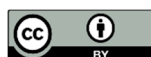

**Copyright:** © 2022 by the authors. Licensee MDPI, Basel, Switzerland. This article is an open access article distributed under the terms and conditions of the Creative Commons Attribution (CC BY) license (<https://creativecommons.org/licenses/by/4.0/>).

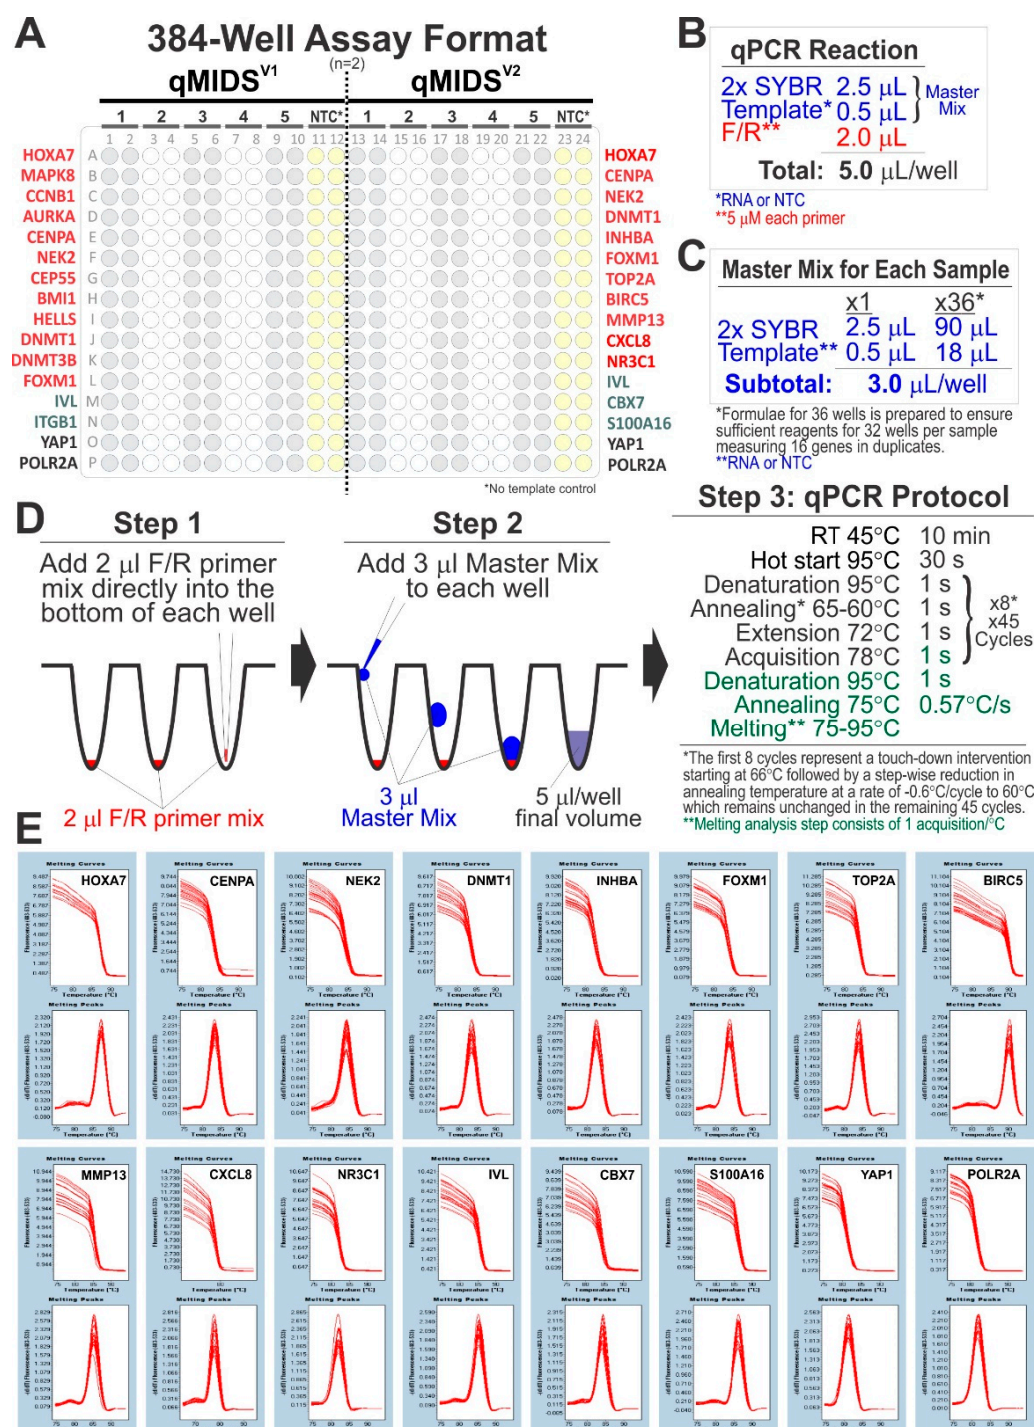

**Figure S1.** – qMIDS<sup>V1</sup> vs qMIDS<sup>V2</sup> 384-well assay format and protocols. A, qMIDS<sup>V1</sup> vs qMIDS<sup>V2</sup> assay layout for 5 samples in duplicates. B, qPCR reaction composition per well. C, Master mix preparation for each sample sufficient for n=32 wells. D, Primer (Step 1) and master mix (Step 2) loading procedures, and qPCR cycling protocol (Step 3). Please note that this fast-cycling protocol was achievable preferably by using qPCR BIO SyGreen 1-Step Go (PCR Biosystems, PB25.31-12) or potentially others that allow high speed qPCR cycling. For other standard SYBR green master mix reagents, increase the 1s steps to at least 5s. E, A representative melting curve analysis (top panels: y-axis, fluorescence and x-axis, temperature °C) for each of the 16 genes in qMIDS<sup>V2</sup> showing single melting peak [bottom panels: y-axis, -(d/dT) fluorescence and x-axis, temperature °C] for each gene.

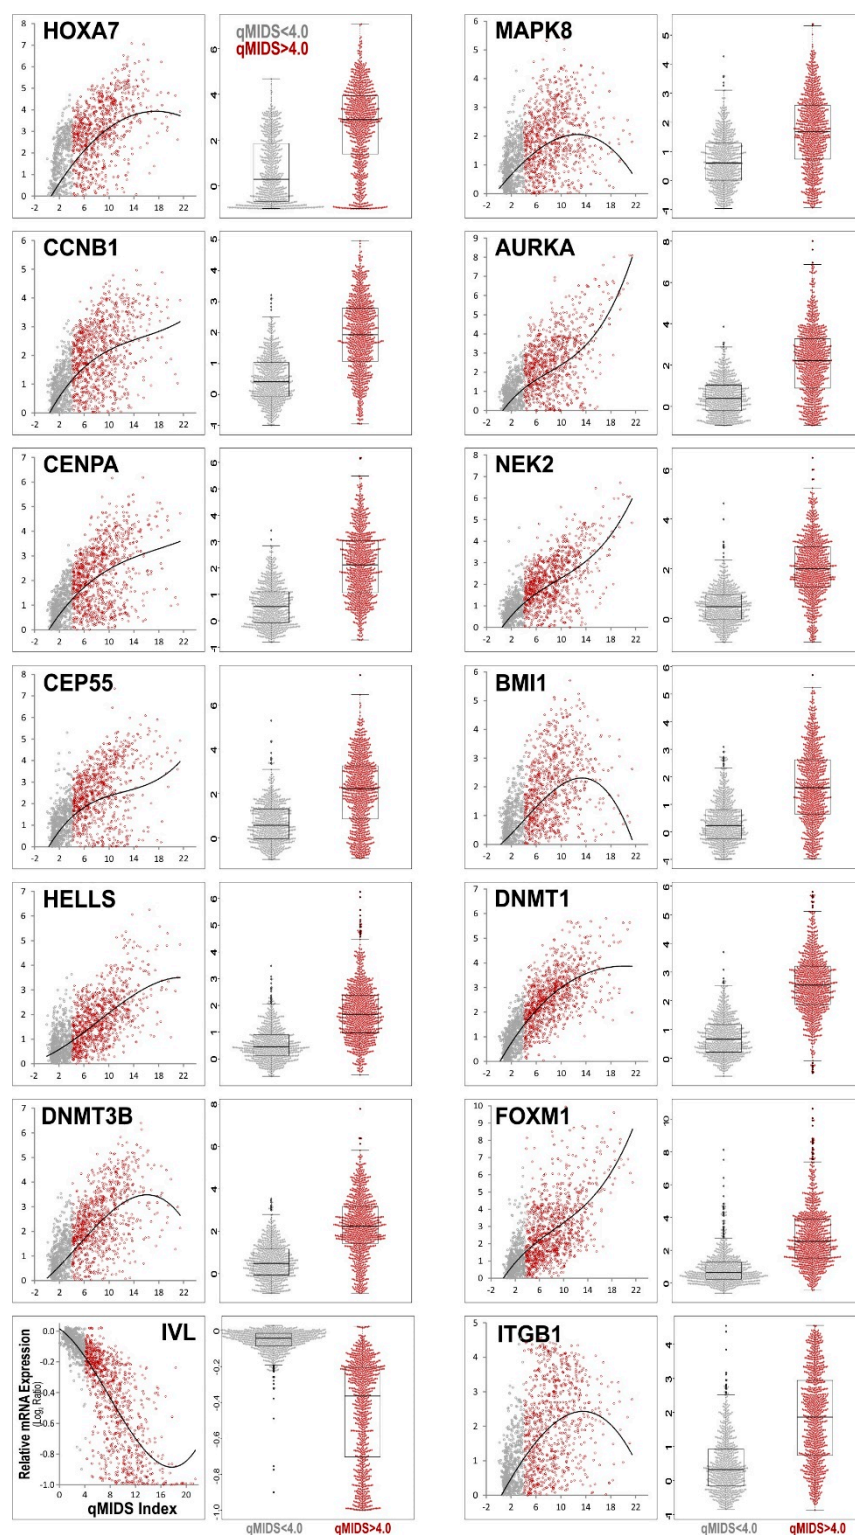

**Figure S2.** Individual target gene expression pattern in 1761 samples (normal/margin and core OSCC samples) in correlation with qMIDS<sup>v1</sup> index values (scattered dot-plots, left panel) and seg-segregated beeswarm plots (cut-off at 4.0 (Teh *et al.*, 2013), right panel). Data points in grey and red indicate qMIDS <4.0 and >4.0, respectively. Regression  $R^2$  and t-test P-values are shown in Supplemental information Figure S3.



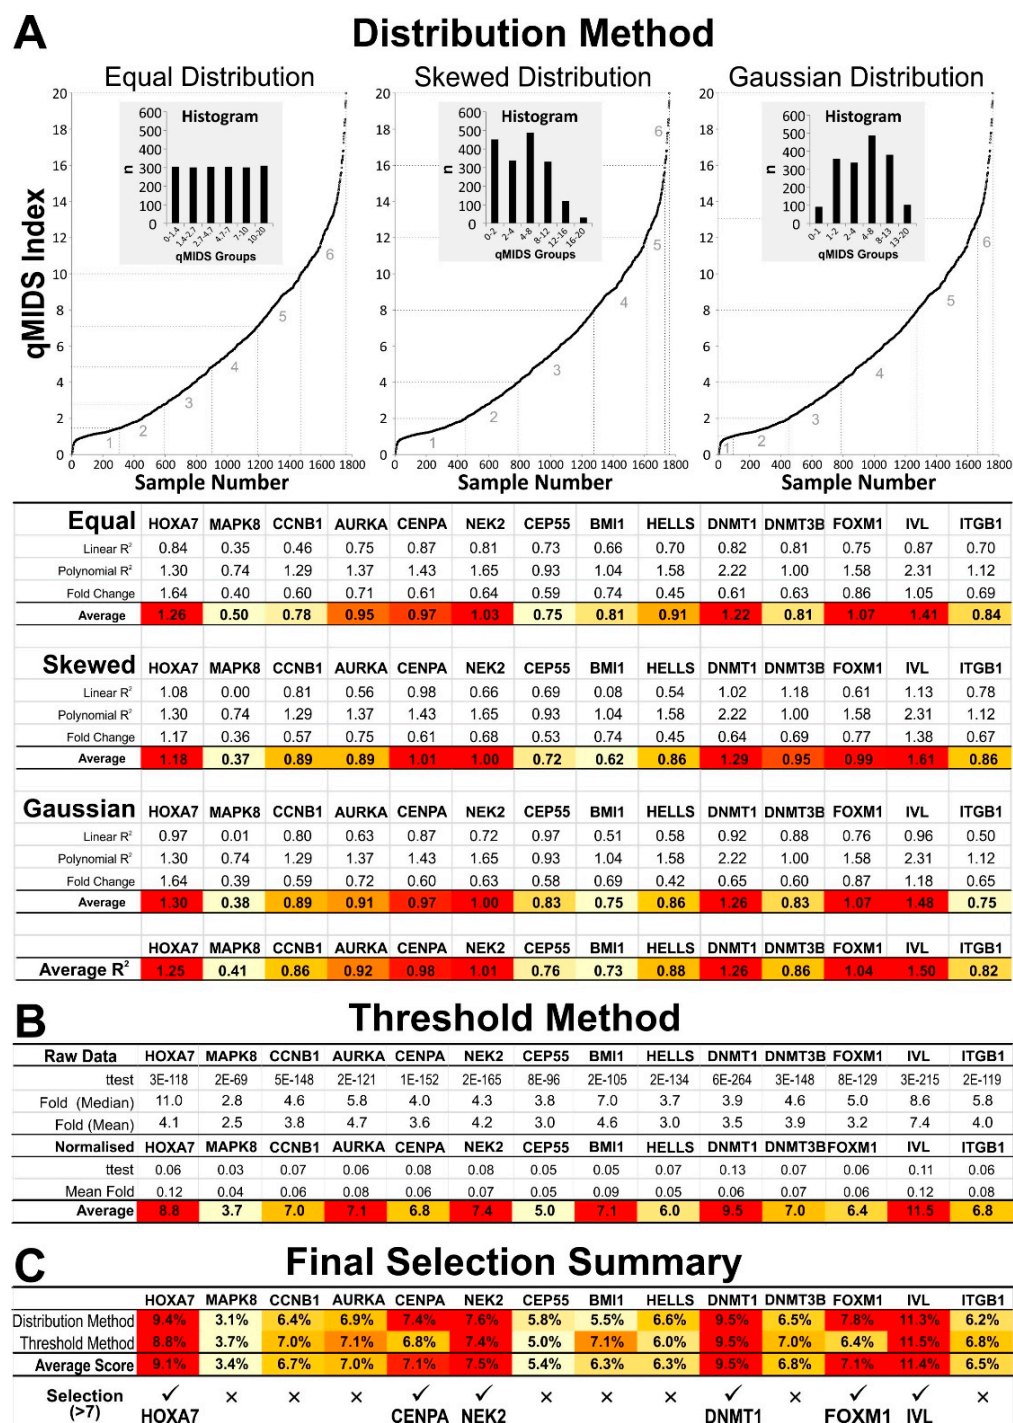

**Figure S3.** Various statistical methods used for gene selection analysis on 1761 clinical samples (from Figure S2). A, Distribution methods using either equal, skewed or Gaussian distribution for grouping samples based on their qMIDS values. Insets showed histograms of qMIDS<sup>V1</sup> groupings (6 groups). Linear and polynomial regression analyses were applied on each distribution method. Fold changes were also calculated between group 1-3 and group 4-6. R<sup>2</sup> and *t*-test *P*-values were normalised and overall average values were obtained for each gene. Heat map colour grading (from low/yellow to high/red) indicates the strength of correlation with qMIDS<sup>V1</sup>. B, Threshold method is based on qMIDS<sup>V1</sup> cut-off value at 4.0 (Teh *et al.*, 2013). Gene expression data were either raw (relative to reference genes) or normalised (Log<sub>2</sub> Ratio) values. C, Final selection summary of data from A and B. Selection were made for genes with an average score above 7%.

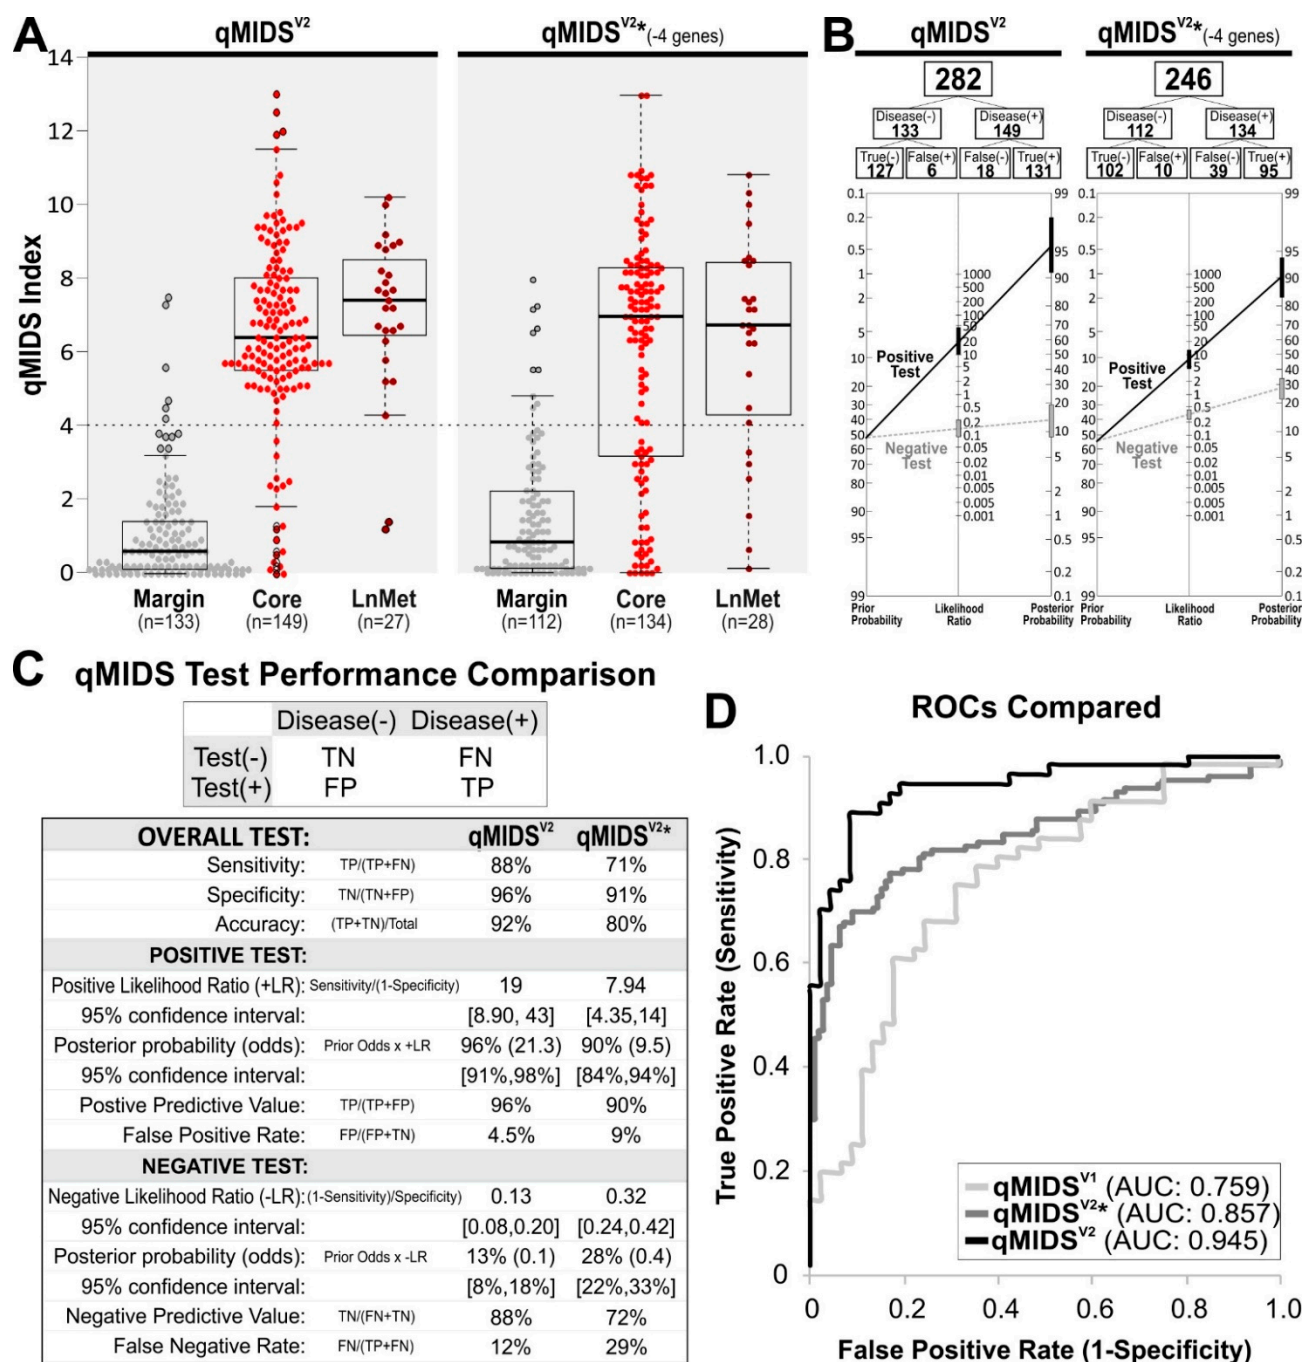

**Figure S4.** Diagnostic performance comparison between qMIDS<sup>V2</sup> vs qMIDS<sup>V2\*</sup> (with 4 less effective genes removed from the panel of 14 target genes of qMIDS<sup>V2</sup>). A, OSCC (margin and tumour cores) and neck lymph-node metastatic tissue samples were independently measured by either qMIDS<sup>V2</sup> or qMIDS<sup>V2\*</sup>. The unequal sample size was due to insufficient tissue left in some samples for experimentation. B, Diagnostic performance analyses were performed on data collected from margin and tumour samples for qMIDS<sup>V2</sup> or qMIDS<sup>V2\*</sup> from panel A. C, Diagnostic test performance table comparing between qMIDS<sup>V2</sup> and qMIDS<sup>V2\*</sup>. D, Data from panel A were separately subjected to ROC analysis showing the comparison between qMIDS<sup>V1</sup> (data taken from Figure 3D), qMIDS<sup>V2</sup> and qMIDS<sup>V2\*</sup> with respective AUC values as shown within the panel. TN, true negative; FN, false negative; FP, false positive; TP, true positive.

## A Diagnostic Test Performance Compared

|                                   | qMIDS <sup>v2</sup><br>(qV2) | qV2-HOXA7 | qV2-CENPA | qV2-NEK2 | qV2-DNMT1 | qV2-INHBA | qV2-FOXM1 | qV2-TOP2A | qV2-BIRC5 | qV2-MMP13 | qV2-CXCL8 | qV2-NR3C1 | qV2-IVL  | qV2-CBX7 | qV2-S100A16 |
|-----------------------------------|------------------------------|-----------|-----------|----------|-----------|-----------|-----------|-----------|-----------|-----------|-----------|-----------|----------|----------|-------------|
| TP/(TP+FN) <b>Sensitivity</b>     | 88%                          | 85%       | 85%       | 76%      | 83%       | 84%       | 71%       | 74%       | 81%       | 86%       | 88%       | 86%       | 85%      | 87%      | 87%         |
| TN/(TN+FP) <b>Specificity</b>     | 95%                          | 92%       | 93%       | 96%      | 98%       | 95%       | 96%       | 96%       | 95%       | 89%       | 89%       | 89%       | 92%      | 89%      | 71%         |
| (TP+TN)/Total <b>Accuracy</b>     | 91%                          | 88%       | 89%       | 85%      | 90%       | 89%       | 83%       | 85%       | 88%       | 88%       | 89%       | 88%       | 88%      | 88%      | 79%         |
| TP/(TP+FP) <b>PPV</b>             | 96%                          | 92%       | 93%       | 96%      | 98%       | 95%       | 95%       | 96%       | 95%       | 90%       | 90%       | 90%       | 93%      | 90%      | 77%         |
| TN/(FN+TN) <b>NPV</b>             | 88%                          | 85%       | 84%       | 78%      | 84%       | 84%       | 75%       | 77%       | 82%       | 85%       | 87%       | 85%       | 84%      | 86%      | 82%         |
| FP/(FP+TN) <b>FPR</b>             | 5%                           | 8%        | 7%        | 4%       | 2%        | 5%        | 4%        | 4%        | 5%        | 11%       | 11%       | 11%       | 8%       | 11%      | 29%         |
| FN/(TP+FN) <b>FNR</b>             | 12%                          | 15%       | 15%       | 24%      | 17%       | 16%       | 29%       | 26%       | 19%       | 14%       | 12%       | 14%       | 15%      | 13%      | 13%         |
| ROC <b>AUC</b>                    | 95%                          | 92%       | 93%       | 94%      | 94%       | 94%       | 92%       | 93%       | 94%       | 92%       | 93%       | 93%       | 93%      | 94%      | 87%         |
| <b>Overall Performance Score*</b> | <b>10</b>                    | <b>7</b>  | <b>7</b>  | <b>6</b> | <b>9</b>  | <b>8</b>  | <b>5</b>  | <b>5</b>  | <b>7</b>  | <b>6</b>  | <b>7</b>  | <b>6</b>  | <b>7</b> | <b>7</b> | <b>3</b>    |

\*Normalised Ratio of [sensitivity + specificity + accuracy + positive predictive value (PPV) + negative predictive value (NPV) + AUC] : [false positive rate (FPR) + false negative rate (FNR)]

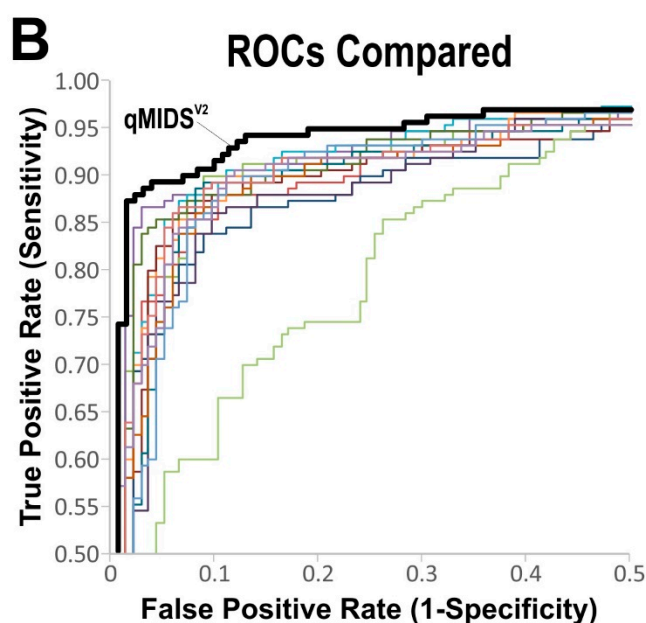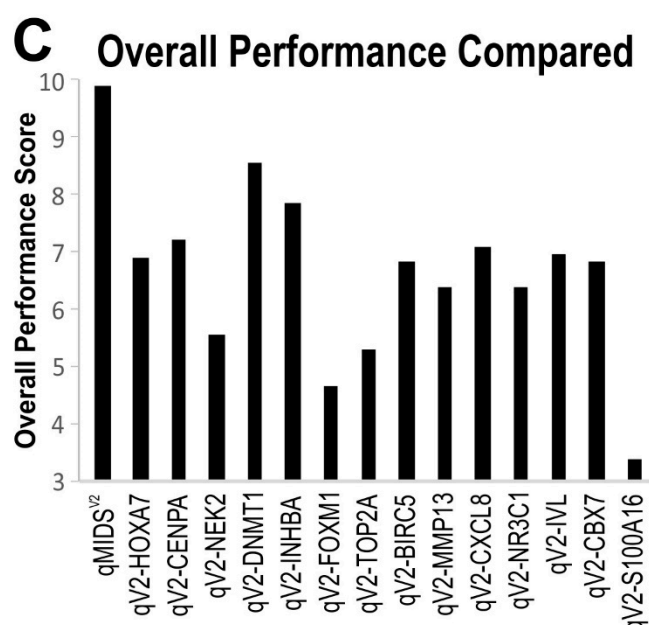

**Figure S5.** Effect of removing individual genes from the 14-target gene panel qMIDS<sup>v2</sup> (qV2) on diagnostic test performance based on the UK patient cohort data. A, a table showing the diagnostic test performance data of removing each gene from qV2. A normalized overall performance scores were calculated to summarise the diagnostic performance for each gene removed. B, Data in panel A were subjected to ROC analysis for comparisons. AUC results (in %) for each curve are tabulated in panel A. C, Graphical representation of the overall performance scores calculated from data in panel A. TN, true negative; FN, false negative; FP, false positive; TP, true positive.
